# Supplementary material
Source: Springer Nature journal article supplement (https://www.springermedizin.de/resource/supplementary/12879_2011_1757_MOESM1_ESM.pdf/9443944)

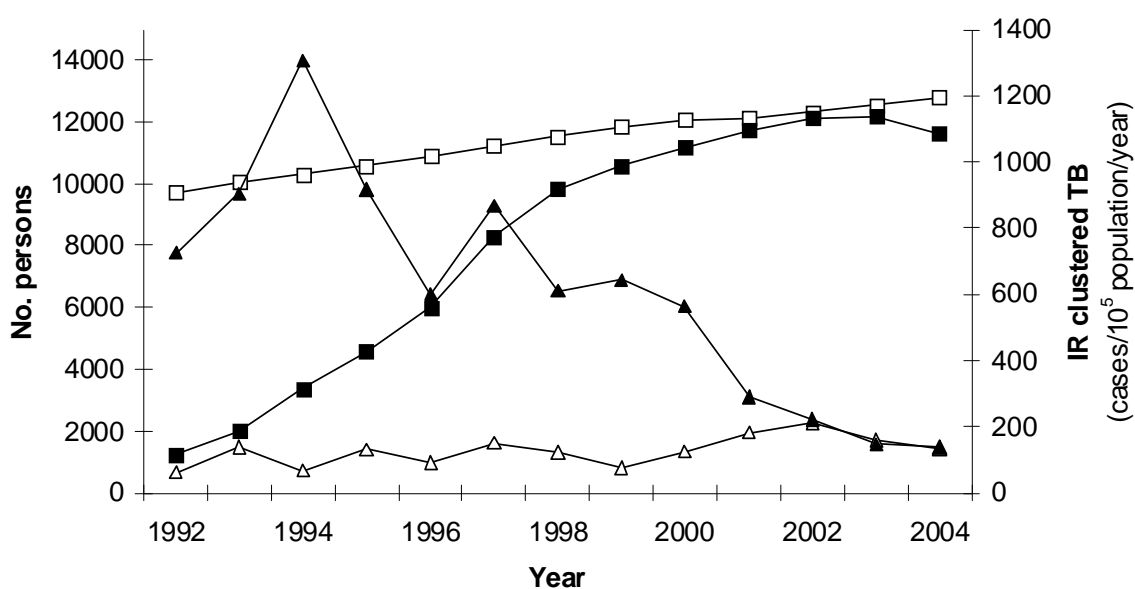

—□— No. Greenlanders

—■— No. Somalis

—△— IR clustered TB Greenlanders

—▲— IR clustered TB Somalis

Supplement: MOESM1 [file 9443944]
